# Supplementary material for: Crystal Growth and Characterization of Single Crystals of Glycine doped with Ammonium Bicarbonate (GABIC) Crystal
Source: Research Square preprint supplement (doi:10.21203/rs.3.rs-3568643/v1), 2023-11-11
Supplement: Supplementary file 1 [file ea1bf9cf28ef0f5144a58657.docx]

**Table.1 Lattice parameter for grown crystal**

| Crystal | a (Å) | b (Å) | c (Å) | α =β | γ | Cell Volume | Crystal System |
| --- | --- | --- | --- | --- | --- | --- | --- |
| Pure Glycine | 5.012 | 11.971 | 5.457 | 90º | 111.71 | 308.62 | Monoclinic |
| GABIC | 5.102 | 11.971 | 5.458 | 90º | 111.70 | 309.698 | Monoclinic |

**Table.2 Comparison of IR bands in GABIC and doped crystals**

| Pure glycine [23] | Glycine Ammonium Bicarbonate crystal(GABIC) | Glycine doped Znso4.H2O crystal[25] | Glycine doped LAHCL Crystal [26] | Assignments |
| --- | --- | --- | --- | --- |
| 696 | 697 | 694 | - | Carboxylate group |
| - | 892 | 894 | 891 | Stretching C-C |
| - | 1033 | 1033 | 1051 | C-C-N |
| 1112 | 1112 | 1111 | - | NH3+ group |
| - | 1131 | - | 1131 | Wagging NH2 |
| 1311 | 1333 | 1327 | - | CH stretching vibration |
| 1492 | 1443 | 1442 | 1459 | CH3 bending |
| 1554 | 1519 | - | 1519 | NH3+ symmetric deformation |
| - | 1590 | - | 1596 | COO-assymtric stretching |
| 2126 | 2123 | - | - |  |
| - | 2826 | - | 2831 | CH2symmtric stretching |
| - | 3168 | 3170 | 3170 | O-H stretching |

**Table.3 Calculated parameter of GABIC crystal**

| Load P (g) | Hv (kg mm-2) | n | σy(GPa) | C11 (GPa) | Kc (kgm-3/2) | Bi x 105 |
| --- | --- | --- | --- | --- | --- | --- |
| 25 | 18.14 | 3.18 | 24.26 | 18.14 | 8.26 | 8.41 |
| 50 | 31.40 | 3.18 | 33.2 | 31.40 | 11.52 | 22.14 |
| 100 | 45.75 | 3.18 | 41.16 | 45.75 | 23.70 | 48.52 |

**Table.4 comparison of the LDT value with reported values**

| **Crystal** | **LDT Values (GW/cm2)** | **Reference** |
| --- | --- | --- |
| Glycine Ammonium Bicarbonate | 37.04 | current work |
| L-methionine hydrogen phthalate | 23.12 | [37] |
| L-alanine sodium nitrate | 14.51 | [38] |
| L-proline Cadmium Chloride | 4.747 | [39] |
| 2-amino-5-nitropyridinium nitrate(2A5NPN) | 4 | [40] |
| Potassium titanyl phosphate (KTP) | >1.5-2.2 | [41] |
| 2-amino-5-nitropyridine 4-chlorobenzoic2A5NP4CBA | 6.2 | [42] |
